# Supplementary material for: Polymorphisms of Mismatch Repair Pathway Genes Predict Clinical Outcomes in Oral Squamous Cell Carcinoma Patients Receiving Adjuvant Concurrent Chemoradiotherapy
Source: MDPI journal article supplement (doi:10.3390/cancers11050598), 2019-04-29
Supplement: s1 [file s1]

## Supplementary Material

# Polymorphisms of Mismatch Repair Pathway Genes Predict Clinical Outcomes in Oral Squamous Cell Carcinoma Patients Receiving Adjuvant Concurrent Chemoradiotherapy

Thomas Senghore, Wen-Chang Wang, Huei-Tzu Chien, You-Xin Chen, Chi-Kuang Young, Shiang-Fu Huang and Chih-Ching Yeh

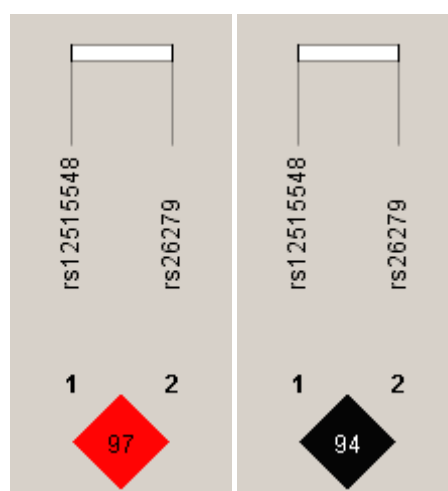

*MSH3* (rs12515548 and rs26279)

**Figure S1.** Linkage disequilibrium analysis between SNPs in *MSH3* (rs12515548 and rs26279). The numbers in the squares indicate pairwise  $D'$  (left) or  $R^2$  (right) values and the corresponding shades of red or black represents the degree of linkage disequilibrium between pairs of SNPs.

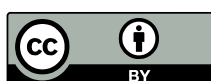

© 2019 by the authors. Licensee MDPI, Basel, Switzerland. This article is an open access article distributed under the terms and conditions of the Creative Commons Attribution (CC BY) license (<http://creativecommons.org/licenses/by/4.0/>).
